# Supplementary material for: Development and application of a microarray meter tool to optimize microarray experiments
Source: Springer Nature journal article supplement (doi:10.1186/1756-0500-1-45), 2008-07-11
Supplement: Additional file 1 [file 1756-0500-1-45-s1.pdf]

## **Supplementary Figures**

### **Supplementary Figure S1**

#### **Plate Layout Format for 4x4 pin configuration**

A 24 quadrant printing plate layout containing a series of *Bacillus subtilis* DNA sequences, *ybaQ*, *ybaS*, *ybhR*, *ybdO*, *ybaF*, *ybaC* and *ycxA*, all present at 200, 20 and 2 ng/μl respectively. In addition *ycxA* was present at 5, 0.5 and 0.05 ng/μl.

### **Supplementary Figure S2**

#### **Plate Layout Format for 1x12 pin configuration**

An alternative printing plate containing the same sequences was prepared to accommodate the Molecular Dynamics GenIII spotter which has a 1 x12 proprietary pin format. Each probe was replicated 12 times, with plate columns 1-12 and 13-24 containing replicate probes. All DNA was reconstituted in 50% DMSO.

### **Supplementary Figure S3**

*Bacillus subtilis* gene sequences used for the microarray meter.

### **Supplementary Figure S4**

#### **Hybridized Microarray Meter Probes**

The arrays were hybridized with the SUA and *B. subtilis* targets as described in the text. Relevant portions of the microarray slides are magnified to illustrate the microarray meter probes printed using (A) BioRobotics Microgrid II equipped with MicroSpot 10K pins,

(B) QArrayMini equipped with Telechem ChipMaker Pins and (C) Molecular Dynamics GenIII spotter.

### **Supplemental Figure S5**

Microarray meter oligonucleotide probes derived from *Bacillus subtilis* sequences.

### **Supplemental Figure S6**

#### **Analysis of the morphological variability in the array features using the *ycxA* probe.**

The coefficient of variation (CV) of the feature diameter on microarrays printed with the BioRobotics Microgrid II, QArrayMini and Molecular Dynamics GenIII spotter was determined and plotted as a function of probe concentration. The *ycxA* probe was printed from six stock probe dilutions ranging in concentration from 200 to 0.05 ng/ $\mu$ l. Each of the 12 pins printed 8 replicate *ycxA* spots per probe per slide. The mean values of the variation observed with each probe concentration across all pins are represented as bars. The error bars denote one standard deviation.

### **Supplemental Figure S7**

#### **Comparison of different slide chemistries by examining signal dynamic range**

Examination of signal dynamic range on microarrays printed on Amersham reflective Type 7\* and Corning Gap II slides. The signal intensities derived from hybridization of Cy5 labeled dynamic range spikes to increasing concentrations of complementary array probes was determined and plotted against the abundance of a particular sequence (expressed as an arbitrary copy number) in the hybridization reaction. Data are plotted

on a logarithmic scale. Each data point represents the mean of 96 measurements, (each of the 12 pins printed 8 replicate spots per probe per slide).

### **Supplemental Figure S8**

#### **Comparison of different slide chemistries by examining the coefficient of variation of probe intensities**

The microarray meter probes were printed from stocks at 200, 20 and 2ng/ $\mu$ l as described in the text with every capillary pin on GapII (A) and Type 7\* slides (B). For this CV analysis of all three arraying robots, 12 pins printed 7 probes at the three different concentrations as 8 replicate spots on one slide. The mean values of the variation observed with each probe across all pins are represented as bars. The error bars denote one standard deviation.

### **Supplemental Figure S9**

#### **Comparison of hybridization buffers by examining signal dynamic range**

Estimation of a signal dynamic range on microarrays hybridized using two different buffer types (see text for details). Each data point represents the mean of 96 measurements, (each of the 12 pins printed 8 replicate spots per probe per slide).

### **Supplemental Figure S10**

#### **Comparison of hybridization buffers by examining by examining the coefficient of variation of probe intensities**

The microarray meter probes were printed from stocks at 200, 20 and 2ng/ $\mu$ l with every capillary pin on Type 7\* slides. Hybridization was carried out using either buffer 1 (A) or buffer 2 (B), see text for details. The mean values of the variation observed with each probe across all pins are represented as bars. The error bars denote one standard deviation. For this CV analysis of the hybridization buffers, 12 pins printed 7 probes at the three different concentrations, as 8 replicate spots on one slide.





### Supplemental S3

#### *Bacillus subtilis* gene sequences used for the microarray meter

##### YacK

CCTGTCATCTATATTGCNNTTTTGTGCTCCGGGTACACCGCTCAGAGCGGGGATGGAAA  
ACGTCTTGAGAGCAAATACAGGCGGTCTGATTGTTGTTGGATATAATGATAAAGTAAAAG  
AAGTGGTGGACGGCGGCTTTCACATAAACACGGCTTTTTCTCCGGCGCATTATATGAGC  
TGGCTAAAATGGATGGAGCGATCATTTTAAGTGATTCTGGTCAAAGATCCTATACGCGA  
ATACTCAGCTGATGCCGGATGCCACAATTTCTTCATCAGAAACAGGAATGCGGCACAGAA  
CTGCCGAAAGAGTAGCTAAGCAAACCTGGCTGTCTTGTAAATCGCCATTTCTGAAAGAAGAA  
ATGTCATAACGTTATATCAGGAAAACATGAAGTATACTAAAAGACATAGGATTTATTT  
TAACCAAGGCGAACCAAGCCATTCAAACACTTGAAAAATATAAGACAATCCTCGATAAAA  
CGATTAATGCACTGAACGCGTTAGAGTTTGAGGAACTTGTTACCTTCAGTGATGTCTTGT  
CTGTCATGCATCGTTATGAAATGGNACTGGGAATCCAAAACGAAANTTATATGTNTATCC  
AAAAACTNGGGGACNAAAANGNCTCTTNATCNAACTGCANNNCCTTNGANTTTTTTTNCCG  
GATTGAAAAAAAAGNCCNTTTTTTTTTTTTGGGGCCTTTGTAANAAAAAATNAAAA  
ANCCGTTTNTTCTTTGNAAGANC

##### ybaF

GGNAGCATGATTATCGGCAAGTATGTCCCGGGGACTTCACTTGTGCACCGGCTTGACCCC  
AGAACA AAACTGATCACGATCTTTTTATTTGTCTGCATTGTATTCTTAGCCAATAATGTT  
CAGACATATGCGTTGCTTGGTTTATTTACAATTGGCGTCGTTTCTTTAACAAGAGTTCCT  
TTCTCTTTTTAATGAAAGGGCTGAAGCCAATCATCTGGATTGTCCTTTTTACGTTTCCT  
CTTCACATTCTTATGACACATGAAGGACCGATTATCTTTCAAATAGGTTTTTTCAAAGTC  
TATGAGGGCGGTCTGGTTCAGGGGATATTCATTTCTCTTAGATTCGTCTATTTGATTTTA  
ATCACAACCTTATTAACGCTTACGACTACACCGATTGAGATTACCGATGGAATGGAGCAG  
CTGCTGAACCCATTGAAAAATTAAGCTTCCTGTTTCATGAGCTGGCTCTTATGATGTCA  
ATTTCTTTACGGTTTATTCCGACACTGATGGAGGAGACAGATAAGATCATGAAGGCTCAG  
ATGGCGCGAGGCGTTGATTTTACAAGCGGGCCTGTCAAAGAAAGAGTGAAGGCTATTGTC  
CCGCTTCTTGTCCCGCTCTTCGTGACGCGATTTAAACGCGCCGAAGAGCTTGCGGTGGCA  
ATGGAAGCAAGAGGCTATCAAGGCGGAGNAAGGACGTACNAAATATAGAAAGCTTGTATG  
GACAGGAAAAGACACTTCTGTCATGGGCANCCCTTAANTGGTATTAGCTGGGA

**ybbR**

GCTGGGCTGTGAAAATTATTGCTTCTGCTTTTTCGCGCTCTTGCTTTATGTGGCGGTAAAC  
AGCAACCAAGCACCGACTCCAAAAAACCGGGTGAATCTTTCTTTCCGACATCAACAAC  
GATGAAGCAACTCTGACTGATATTCCGGTTAAAGCGTATTATGATGATGAAAATTACGTC  
GTGACGGGTGTTCCGCAAACGGTTAATGTCACGATAAAAGGCTCGACAAGCGCCGTGAAA  
AAGGCTCGGCAGACCAAAAACCTTTGAAATATATGCCGATATGGAACATTTGAAAACCGGC  
ACACATAAGGTTGAGCTTAAGGCCAAAAACGTGTCGGATGGGCTGACAATCTCAATTAAT  
CCGTCTGTTACGACAGTGACCATTGAGAACGGACGACCAAAAGTTTTCCCGTAGAAGTG  
GAGTACTACAACAAAAGCAAGATGAAAAAAGGCTATTCTCCGGAGCAGCCGATTGTCAGT  
CCGAAAAATGTGCAGATTACCGGATCGAAAAATGTGATCGATAATATTTCTTTGTA  
GCTTCAGTGAATTTGGAAAACGCAGATGAAACGATTGAAAAGGAAGCGAAAGTGA  
TATGATAAAGACGGAAACGCGCTTCCTGTCGACGTGGNAGCCCTCGGTCATCAAGATTAC  
CGTTCCGGTGACAAGCCCGAGTAAAAAGTGCCCTTTAAATTGAACGGACAGGAAGCCTTC  
CTGACGGTGTGACATAGCGAATATTGAATCCAGCCCCNGTGAGGTACGGTTTACGGCTC  
CAGGATGTGTTGGATTCTCTTGAATTTTTGACGGCGNCANCTAAATTTA

**yabQ**

TTCTATACATGCTAGCGATGNCCGGTATGGGANTCTGGCTTGGTGCTTCGCNTGATACAT  
ACCGGCTCTTTGTCATTCGTGCCAAAACAGCCAGATGGCTATTATTTATTCATGATATTC  
TTTTCTGGATTATGCAAGGGCTGCTTTTTCTTTTATGTCTTGCTTCATGTAAATGAGGGAG  
AATTCAGGATTTACATCTTTTTAGCGTTCTGCTGGGCGTTGCGACGTATCAGAGCCTTT  
GCAAACGAATCTATATAAAAATACTGAAATTCGTCATTTACCTTGTTGTTTCTGTTTATC  
AATTCCTCAAAAAACTCATTGACGACGTGTTATTTTCGTCCTATTGTGTGGACATGCGGAG  
CGATCATCTGGCTGGCGGCATTTTTATTCAAGAAAACATACAGCCTGATAGGTTTTCTCC  
TGCTGTGTCTATATAAAATAGTCATGGTTCTGTGTTTTCCGATCCGTTTTATCGCGAAAC  
AATGTTTGAACCTTCTTCCTGTGAAAATGCGTCTAACTTTTAGACGTTATTTTAAAAAG  
GTGCAGGATTTCTCAAAAAGAAGAAGAACTATTGATAACCATAAGAACGACCATCACAG  
GATCCAAAAAATAAACTCGANAAGCTTGGCGTAATCATGGTCATAGCTGNTTTCCTGT  
GTGAAATTGTTATCCGCTCACAATTCCACACAACATACGAGCCGGAAGCCATAAAGTGTA  
AACCTGGGGGGCCTTAATGNNGTGANCTAACTCACATTAATTGCGTTNCGCTNCCTGCC  
CGCTTCAANCGGGAAANCTGTGNGCCACCTGCATTAATGAACCGCCACCCGCGGGG

**ycxA**

ATGCGCCGTCTCCCAGGTCGAAATGGTTTGTATTGCTGTTTACGTTTGTTTTCGCCATCG  
GAATGAACTCATT CAGAAATTCCTTTCAATTTTTATGCTGCCAATGGCAGACGCCTTCC  
ATGCCGACAGGTCGCTGATTTCCGGTTTCTGTCAGCATTTTTATGATCACAACCGGCATCG  
TCCAGTTTTTTGTCCGTTTTTTATCGACCGTTTCAGTGT CAGAAAAATTATGGCGCTGG  
GAGCTGTTTGCATCAGCGCAAGCTTTTTGGTGCTTCTTATTACCGAATGTT CATGTGT  
TTTCCGCCATTTACGGTGTGCTTGGCGGAATCGGGTATTCTGCGCGGTGCGCGTGACGA  
CCCAGTATTT CATCAGCTGTTGGTTTGACACACACAAAGGTCTGGCGCTTGCTATTTTGA  
CCAATGCCAACTCTGCGGGCCTGCTGCTTCTCTCGCCATTTGGGCTGCGGCTCCGTATC  
ATGCCGGCTGGCAGAGCACCTATAACATTTTGGGAATCGTCATGGCGGCTGTTCTGCTGC  
CGCTCCTCGTCTTTGGGATGAAGCACCCGCCACATGCGCAAGCGGAAACTGTGAAAAAAT  
CTTATGATTGGCGAGGGTTTTGGAACGTGATGAAGCAATCCCGCCTCATT CATATCCTGT  
ACTTCGGCGTGTTTACTTGCGGATTTACAATGGGAATTATTGATGCTCACCTCGTCCCG  
ATACTGAAGGATGCGCATGTCTCATGTCAACGGAATGATGGCCNCGTT CNGGGGCATT  
TATCATCATTGGCGGNATTATGGGCGGGCTGGCTGNCAAATCTCCTCGGCAGC

**ybaS**

CTGGCTTGGACTTTGCTTTTTATTGTTTTGCAGGCAGTTTGAGCGCGAACTTTCAATCTTT  
GAGACATGCATTGTCTCATCCTCTCCCTATGATTCTTGCACTATTCGTTCTTCATATTTT  
CATGCCGCTTTTTGCTTGGGGCAGCGGCCATCTTATATTTAAAGGTGATCCTTTGACGAT  
TACCGGTTTAAACATTGGCTGTTGTGATTCTACGGGGATTACAAGCTTGATTTGGGCAGC  
GATGTACAAAGGGAATGTCGGTTTGACACTTTTCGATTATTTTAGTTGATACTGTGCTGTC  
ACCGCTAATCGTACCGCTGAGTCTTTCATTGCTGGCCGGCGCTCAGGTTACATGGATGT  
GTGGGGAATGATGAAAGGTCTGATTGTAATGGTTCGTGATTCTTCTTTTTTGGGCATGCT  
GTTTAATCAGATGTCATCTCCAGAAAGAACTGCGTTTGTGAGCAGTGCCTGTGCGCTTT  
TTCAAAGCTTTGCTTGATGGCAGTGATTGCGATTAACAGTTCAGCGATTGCTCCTTATTT  
CNAATCCATTGATTTGAAANTTGCAAGNAANNCTGGNACCGNNATCNTTTTCGCGTTAAC  
AGGTTNGCCGCTGCTTGGCTGATCGGAAAATGATGAAAGGCGGCAANAGAAATAGTCTCT  
CTTATATTNCGGGAGGCATGAGGAATATTANGCCGGCGCAGTTCTTGCCGTTACTTCTC  
CCTCTCAGTTGCCGTT CNGTTGTGATCGGCATGCTGTTTACCANATATTGGCTGCTTT  
GTTTGGCTATTGCTGAATCGNT

**ybdO**

NTGAACGGCAATTTATCCGCANTCAGCCTGATTGCACAGAACATATTGAGCAAGAATGCG  
CCTGCCAAACGGGAGAATGCGACTGAAAATCCAGCGGCAGTTCTGGAAAAGGCATATAGC  
AGGCTTAAGTCACAATCTTCAACTGGGGGAATCAATCAGTTCAATTATTCTAAAACCAGC  
GTGTCGGGAAACAGCGGGACGTTTCAGCAAAGTGTATCAATCAGCGAATGATCGAACAGTG  
ACAGACACAGGGGAAGAAACAGTGATTCAATCCCAAACCCCTATGAATCTGAGAGTGAT  
ATCAGAATCAAATACTAGATGAAAAATACAGCAGGATGAATGCGATTAATAAAACAAAG  
TCTGATCCATTAGGCTATATTAAGGATAGTACCAAATTCNAAGTCCCCNTTTTTTCANAAG  
TGATCTGTCANCTGCAAAAAANAGGCCGCTTACNATAATGAAACAAAANGGNTTTTCNA  
AGGGAAGGNCCNAACTNNACCNTCCGGATGCNNGGTTTCGGANTGCCCTTTCTTGGGG  
AANNGGAACCTNAAANTAAAAGGGNTTNCNCGGNNAGGTTACCNNANCCTNAAANNTT  
NNNTATCNAANNTTTNTTTTNCNCAAGGGGANNNCNGGCNTTTNAACCCCCNTTNT  
NTTTNNGGNGGGGAANCAGGAAAAANANNGGGTTTTTNCNNTTNTTGNACAGGGTCCCN  
NNGGAAAA

**ybaC**

CNGTTGCTGCTTTTTTTTACATGGCGGGCCGGGAACGCCGCAAATCGGATATGTTAGACAT  
TATCAAAAAGAGCTGGAACAGTATTTTACAGTAGTTTCATTGGGATCAGAGAGGATCGGGG  
CTTTCTTATTCTAAGCGAATTTTCGCATCACTCTATGACAATAAATCACTTCATTAAAGAT  
ACAATCCAAGTCACTCAATGGCTTTTAGCTCATTTTTTCAAATCAAACCTTTACCTAGCC  
GGTCATTCTTGGGGATCAATACTGGCGCTTCATGTGCTGCAGCAGCGTCCTGATTTATTT  
TACACGTATTATGGAATCAGCCAGGTTGTTAACCCGCAAGATGAAGAATCAACTGCTTAT  
CAACATATTCGTGAAATTTCCGAATCAAAAAAAGCCAGCATATTATCTTTCCCTTACACGT  
TTCATTGGTGCTCCGCCTTGGAAGCAGGATATCCAGCACCTTATCTATCNGTTTTGTGT  
TGAGCTAACCAGGGGAGGATTCACTCACCGTCATCGTCAATCTCTCGCTGTATTATTTCA  
ATGCTTNCTGGCAATGAGTATGGGAGTGCAGCAATGCACAGCTTCCTTAATGGATTGC  
GCTTCAGNAAAACATTTAACCTGNATGANTTTGTACCGGATTNATGCCTTTTCATCCGN  
TCCTTCTATTAAGNNCCGGGAGGTTTTCATNTCAGGGGAANCANGACCTTAATTGGTN  
CCTGNNGAANATATCGAAAACGCATTANCAAGAACTTGNGGCNCCGAAAANNCGCTTGGT  
TNA

# S4 Hybridized Microarray Meter Probes

**A**

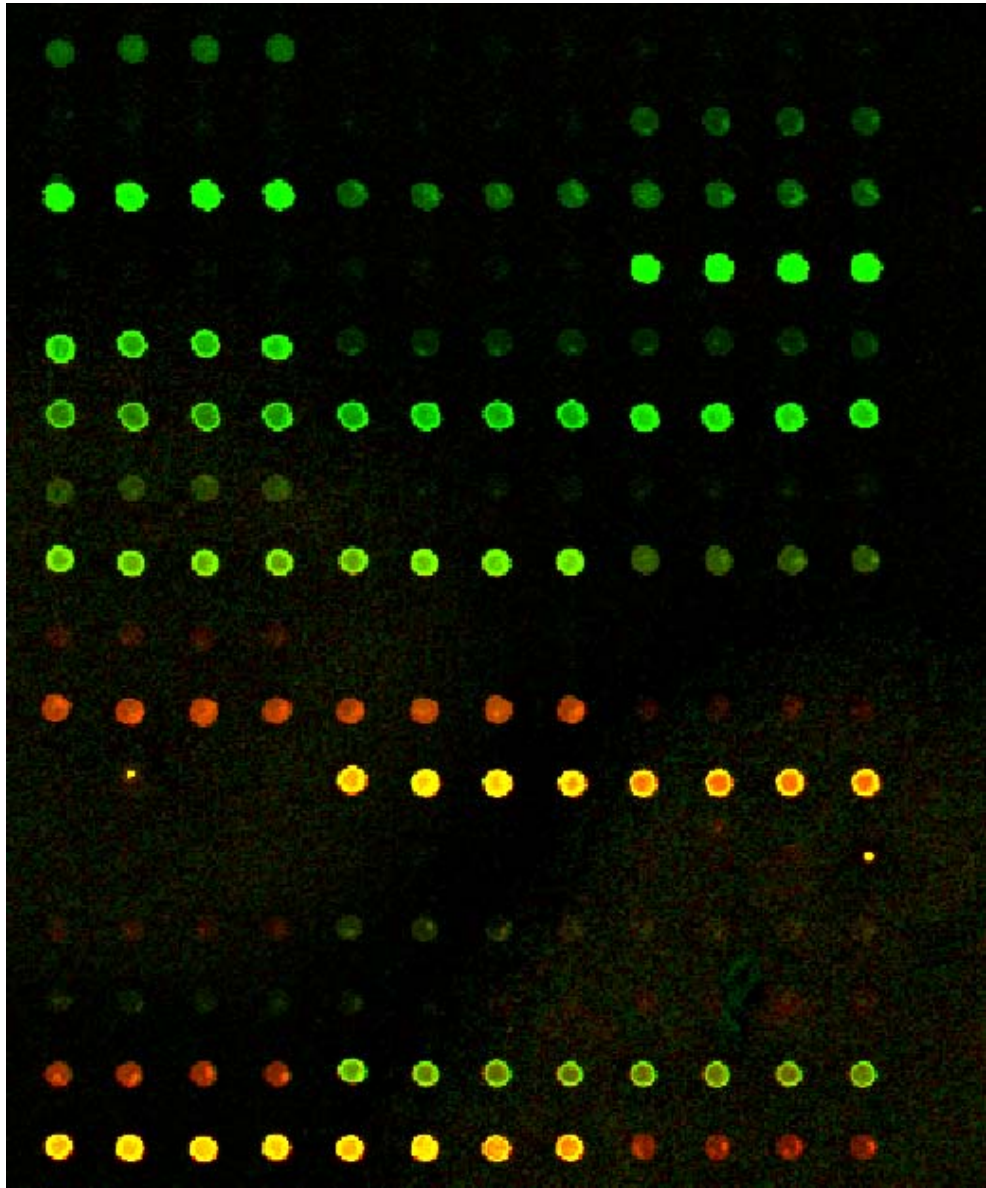

# S4 Hybridized Microarray Meter Probes

**B**

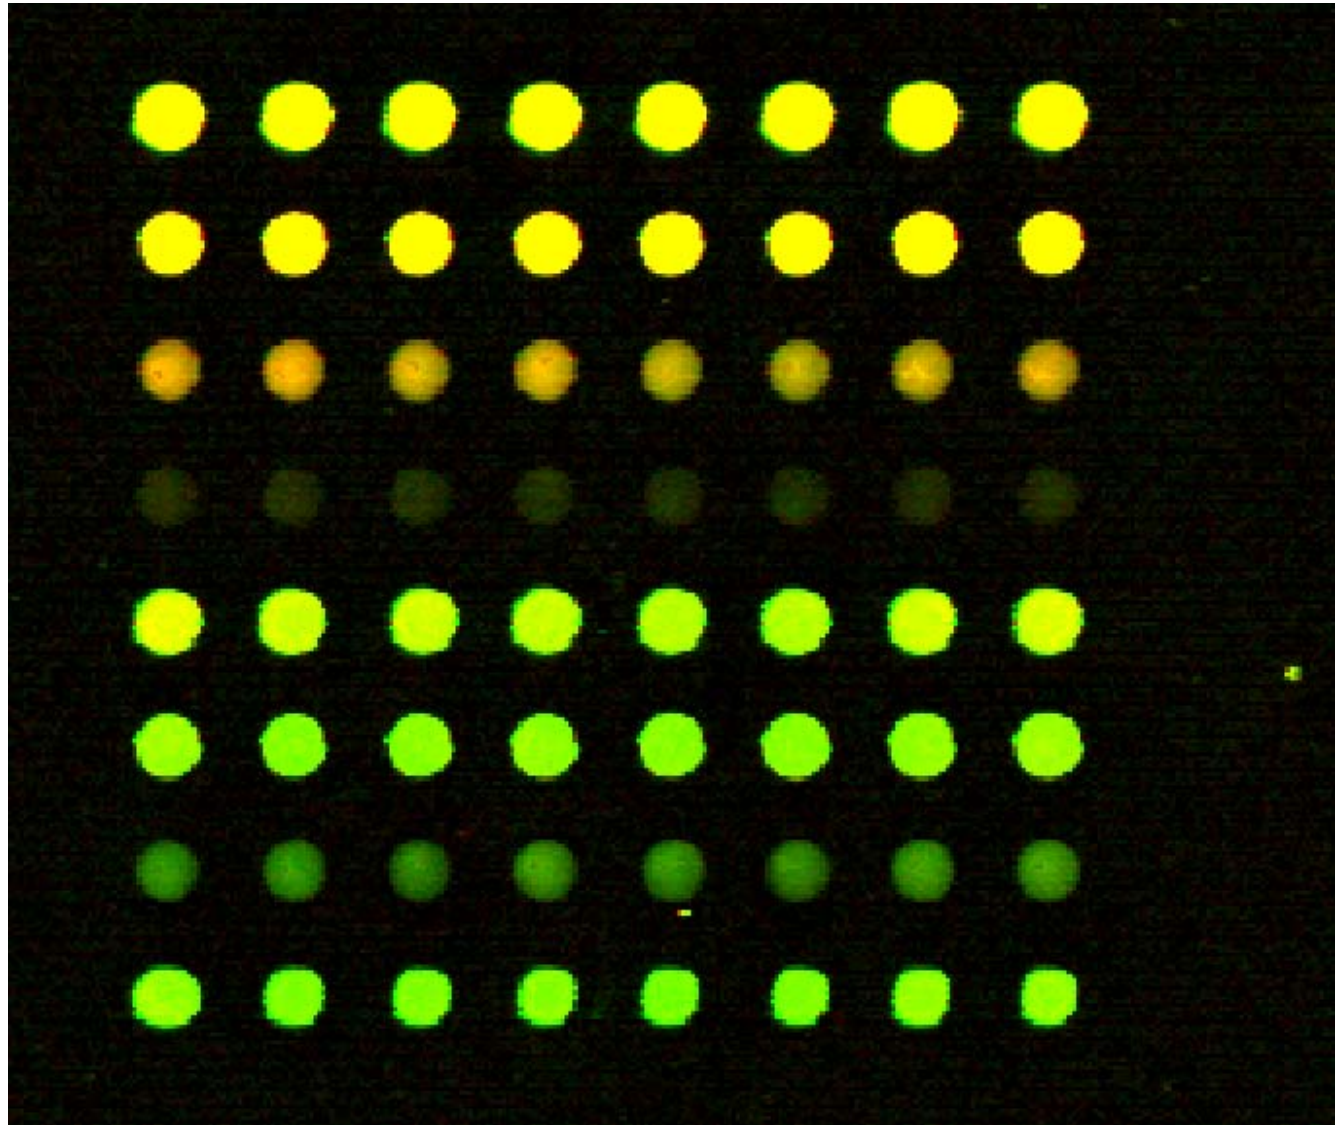

# S4 Hybridized Microarray Meter Probes

C

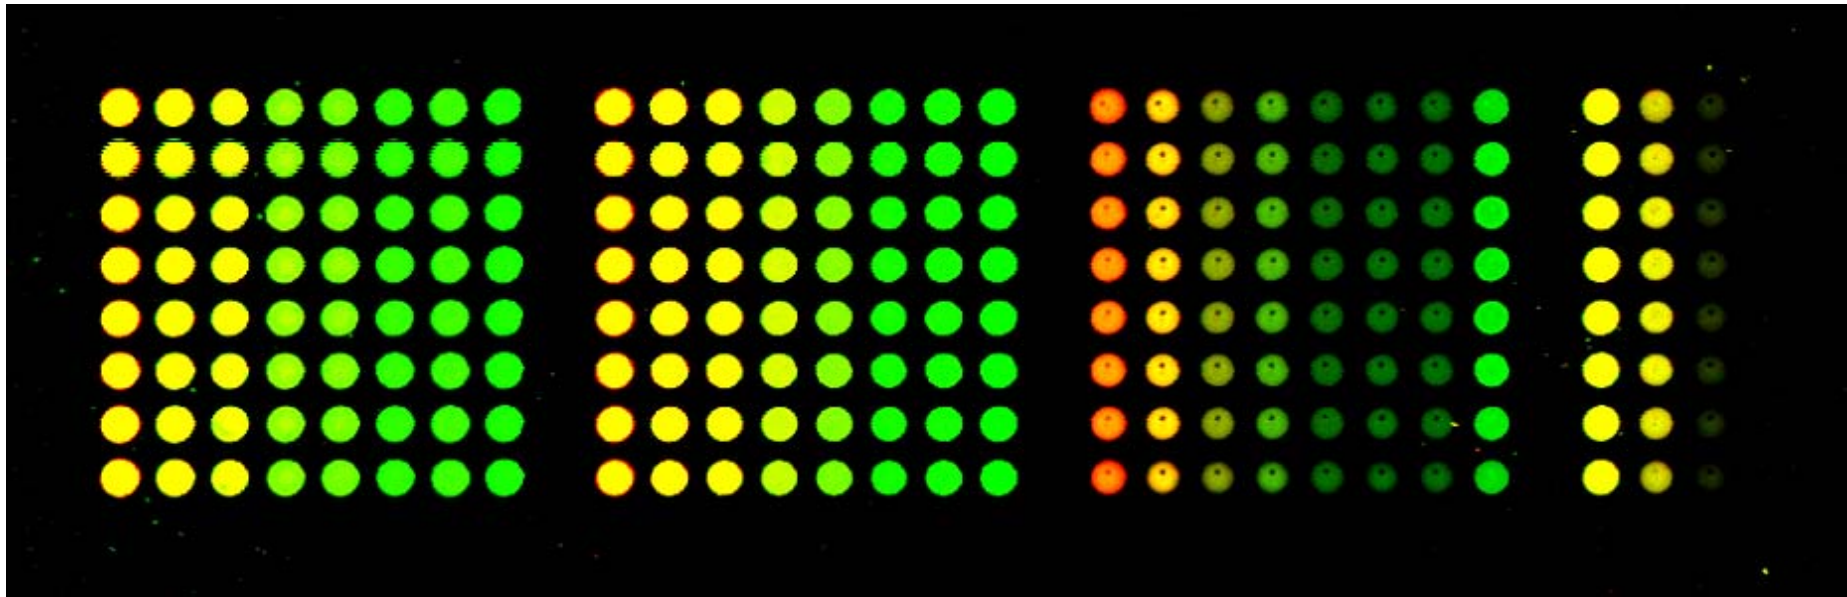

**Supplemental S5**

**Oligonucleotides derived from *Bacillus subtilis* sequences**

**Seq Name array meter oligo probe**

|      |                                                                        |
|------|------------------------------------------------------------------------|
| yabQ | CCCAGTCACGACGTTGCGTACCGCCAGCCAGATGATCGCTCCGCATGTCCACACAATAGGACGAAATAAC |
| yacK | CCCAGTCACGACGTTGCGTAGAAGAAATTGTGGCATCCGGCATCAGCTGAGTATTCGCGTATAGGATCTT |
| ybaC | CCCAGTCACGACGTTGCGTAAAGGTGCTGGGATATCCTGCTTCCAAGGCGGAGCACCAATGAAACGTGTA |
| ybaF | CCCAGTCACGACGTTGCGTATGCTCCATTCCATCGGTAATCTCAATCGGTGTAGTCGTAAGCGTTAATAA |
| ybaS | CCCAGTCACGACGTTGCGTAGGCGACAGCGCACTGCTCACAAACGCAGTTCTTTCTGGAGATGACATCTG |
| ybbR | CCCAGTCACGACGTTGCGTAAGTCAGAGTTGCTTCATCAGTTGTTGATGTCGGAAAGAAAGATTCACCCG |
| ybdO | CCCAGTCACGACGTTGCGTATGATTGATACACTTTGCTGAACGTCCCGCTGTTTCCCGACACGCTGGTTT |
| ycxA | CCCAGTCACGACGTTGCGTACACGCCGAAGTACAGGATATGAATGAGGCGGGATTGCTTCATCACGTTCC |

**A**

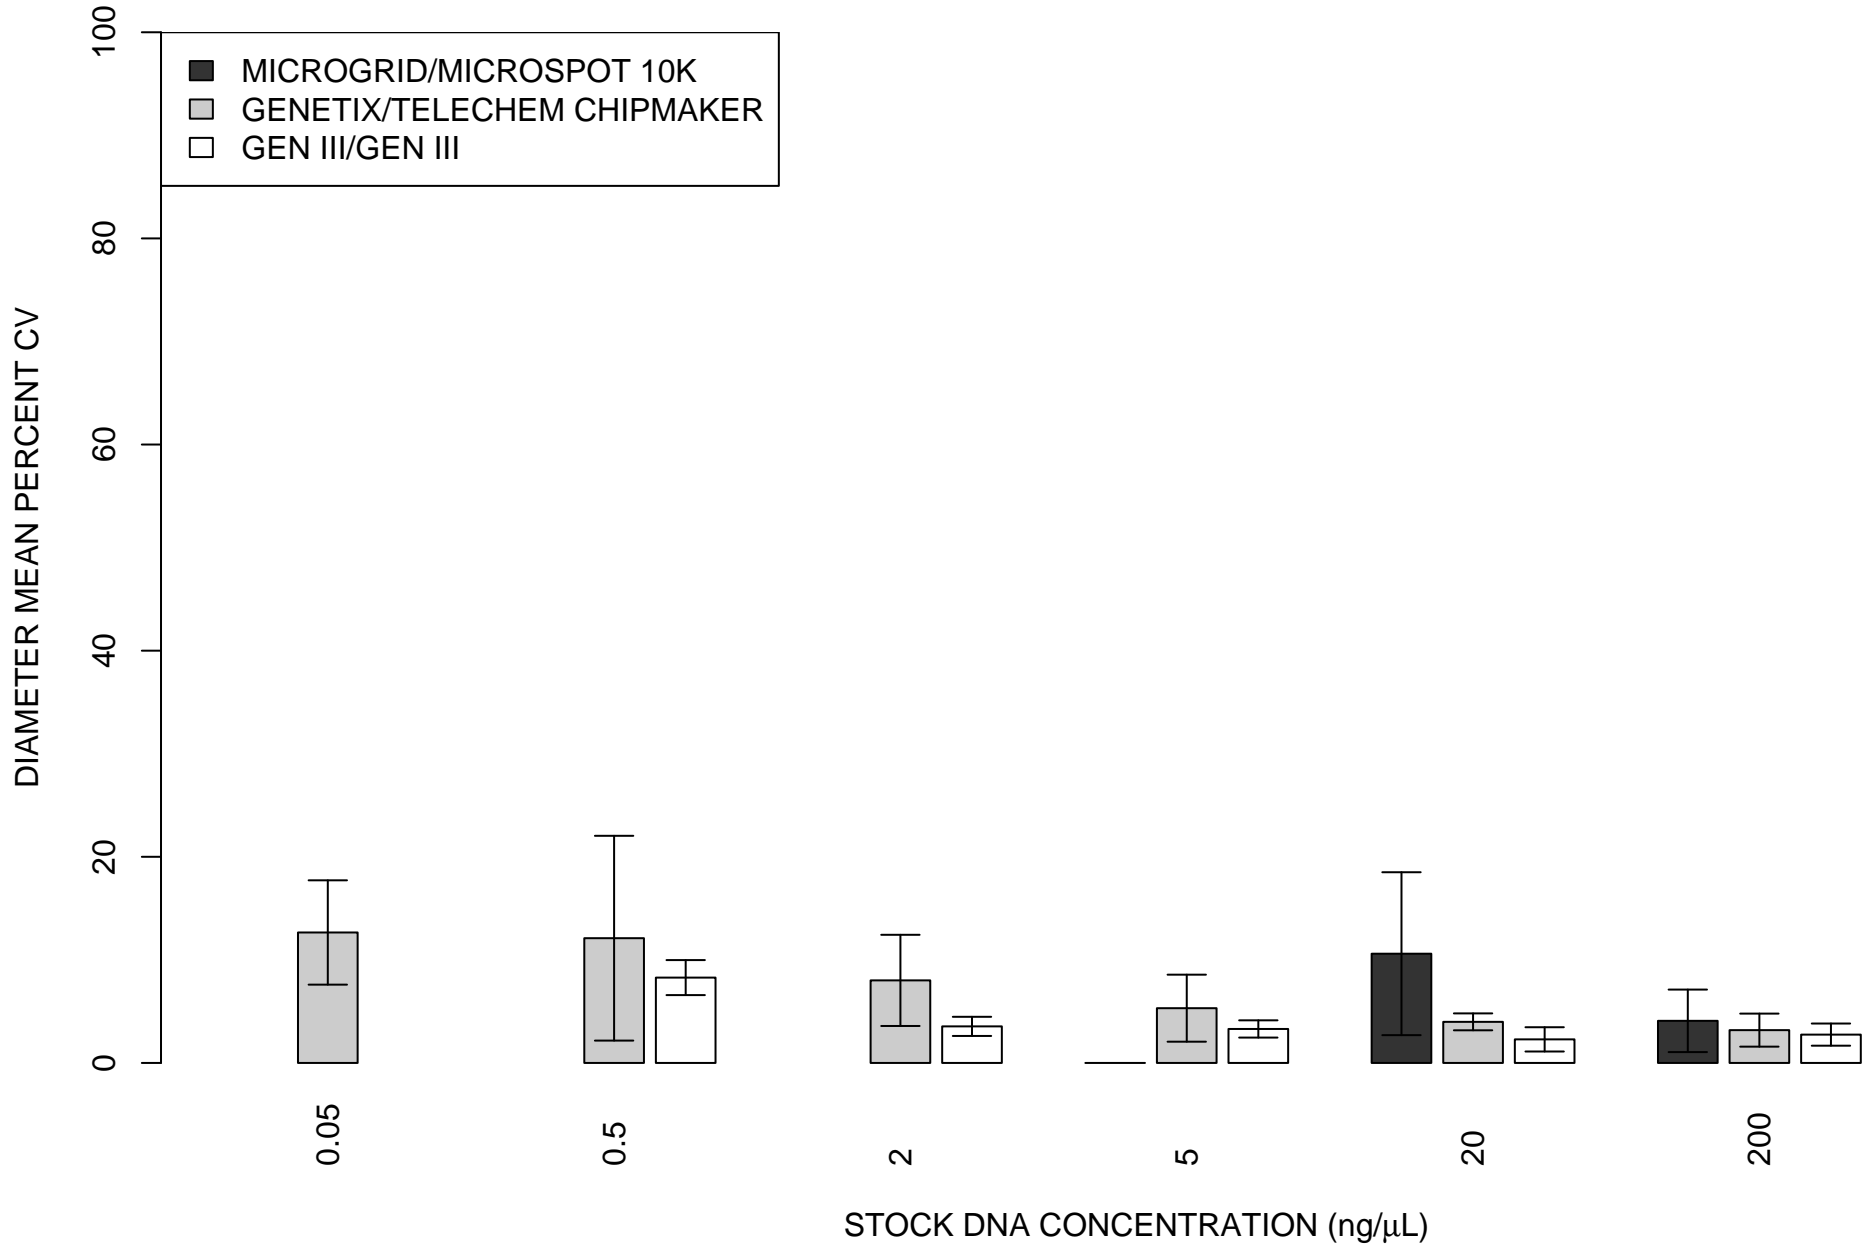

**Supplemental S6**

200

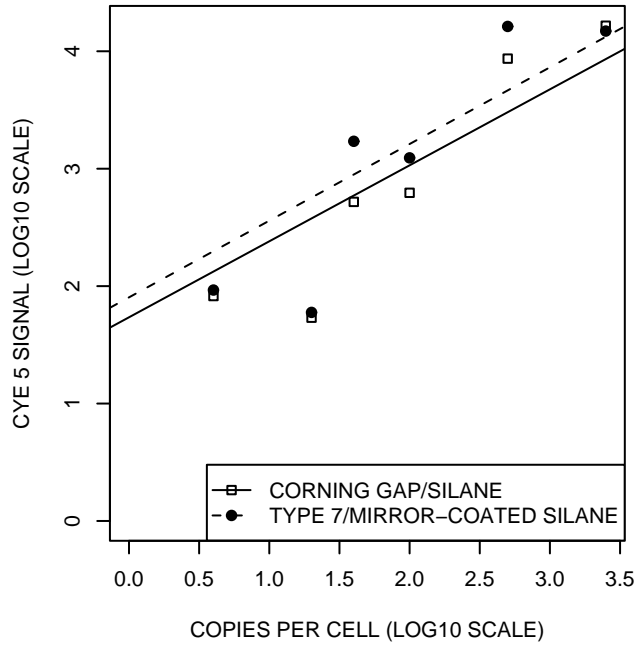

20

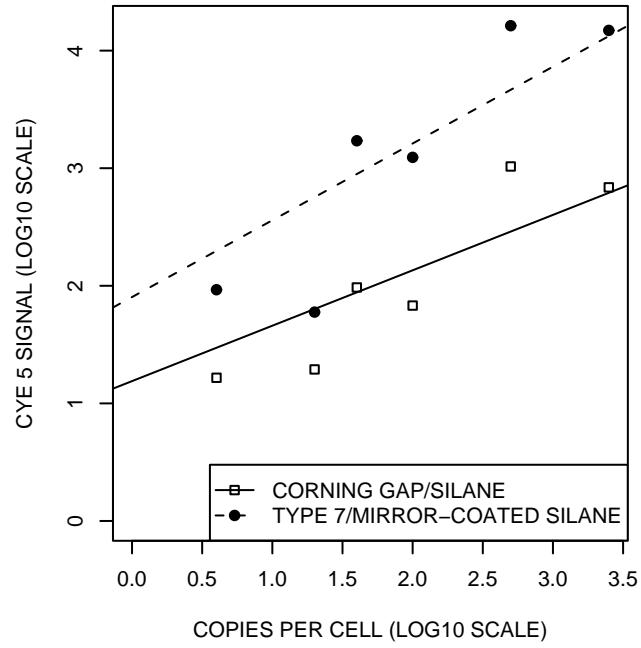

2

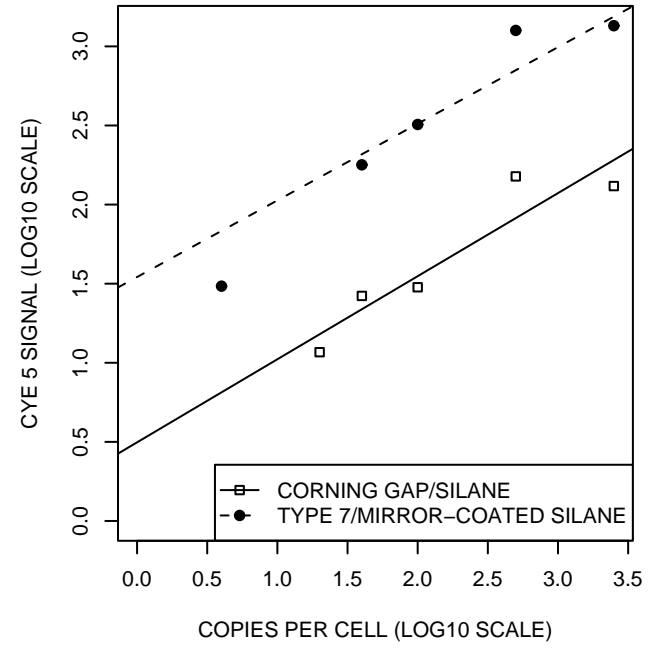

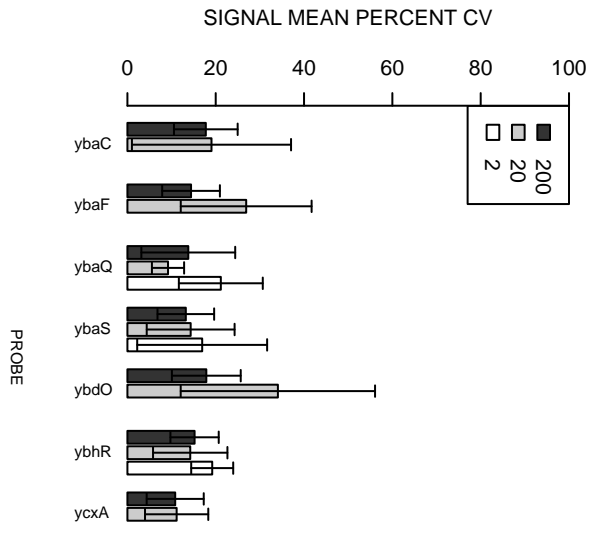

**A**

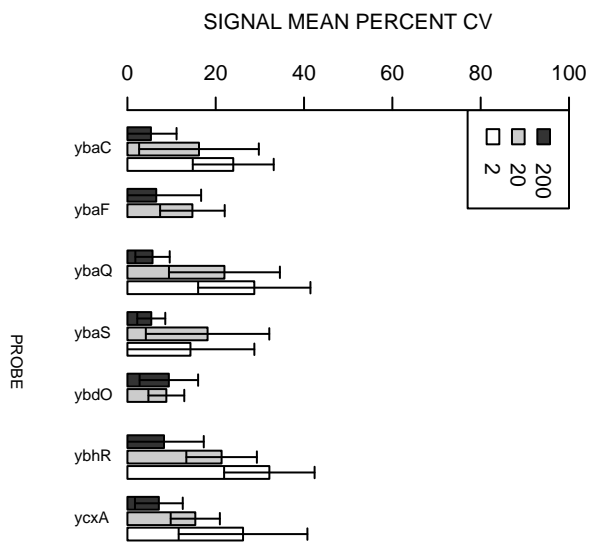

**B**

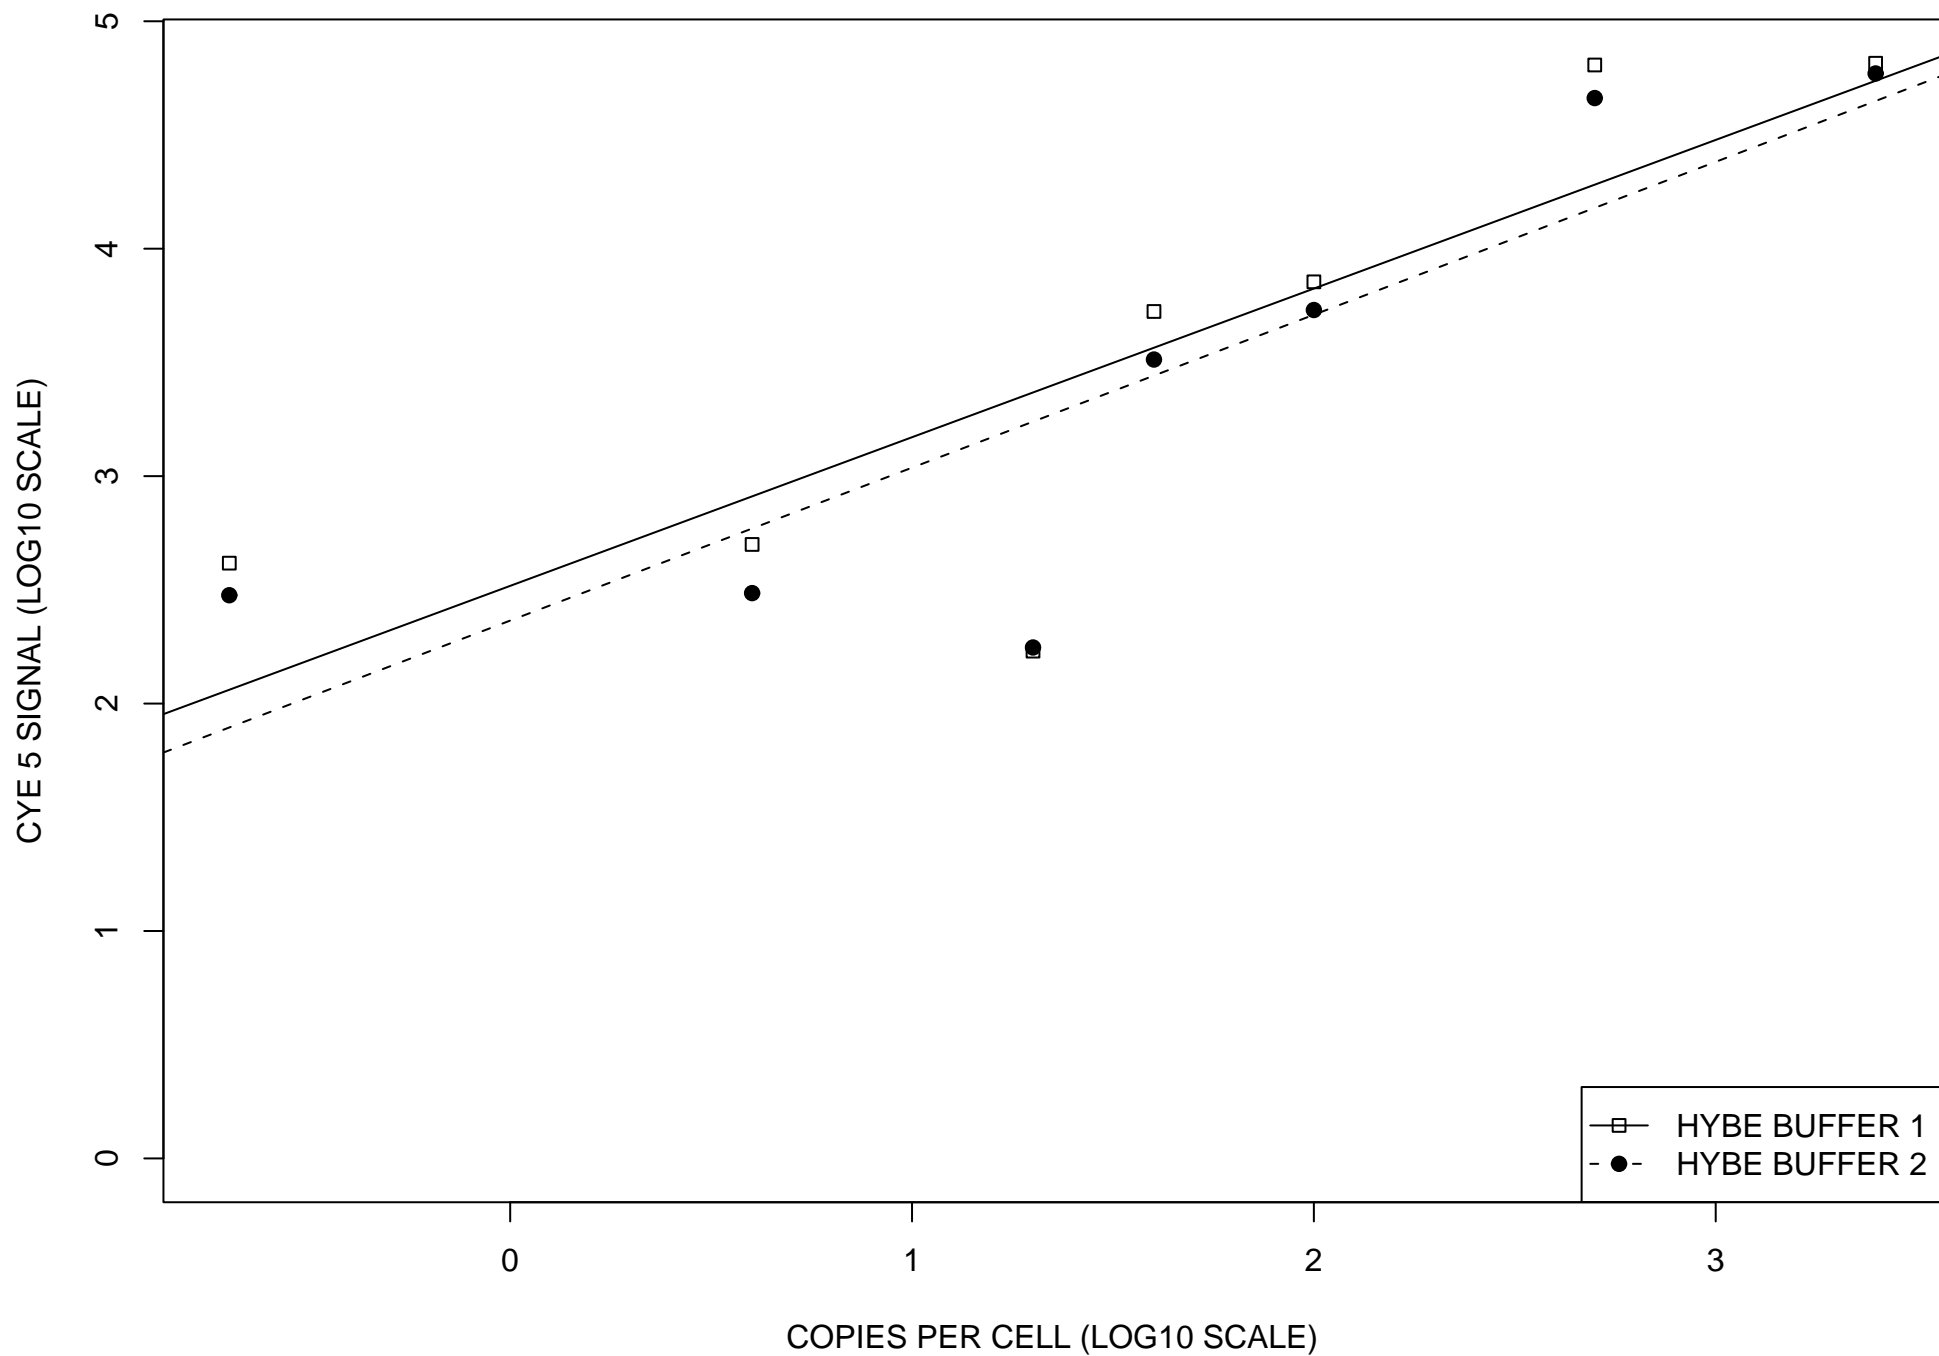

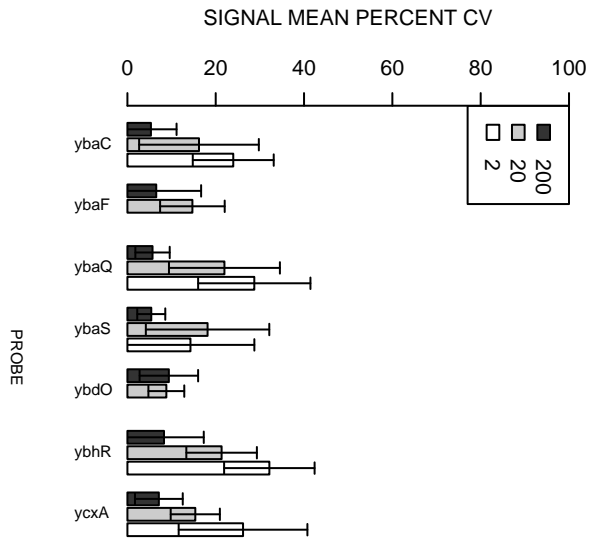

A

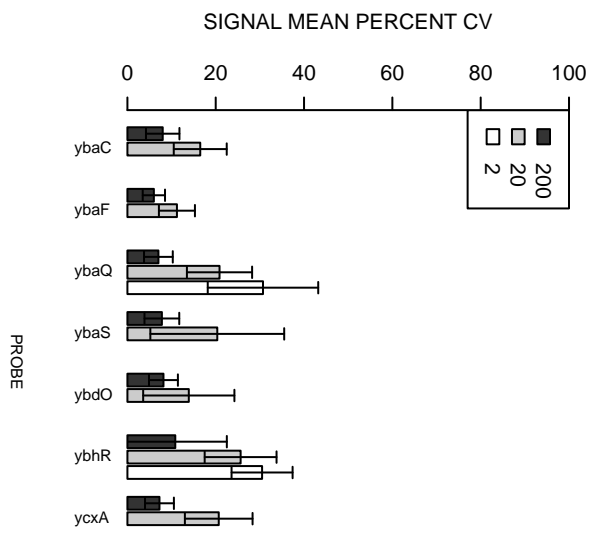

B
